# Supplementary material for: Methylation of Estrogen Receptor 1 Gene in the Paraspinal Muscles of Girls with Idiopathic Scoliosis and Its Association with Disease Severity
Source: MDPI journal article supplement (doi:10.3390/genes12060790), 2021-05-21
Supplement: s1 [file s1]

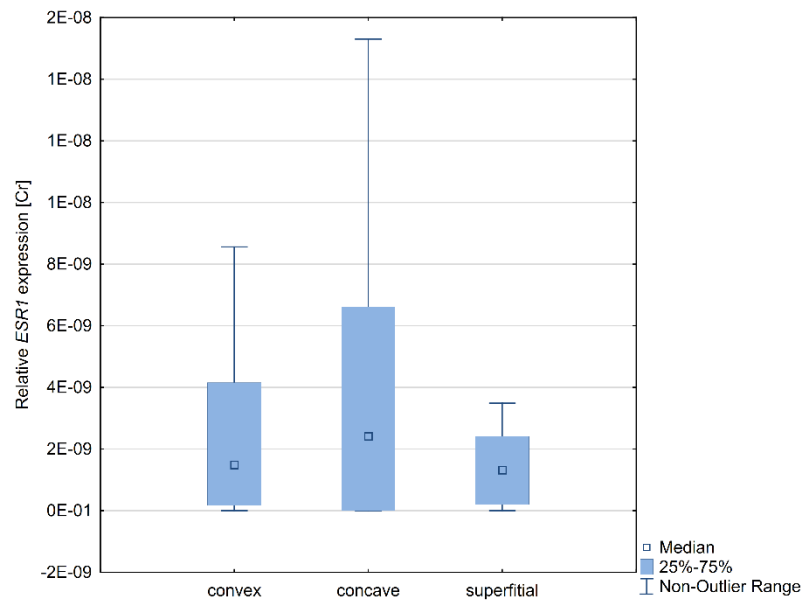

Supplementary Figure S1. Relative *ESR1* expression level in deep paravertebral muscles and superficial muscles.

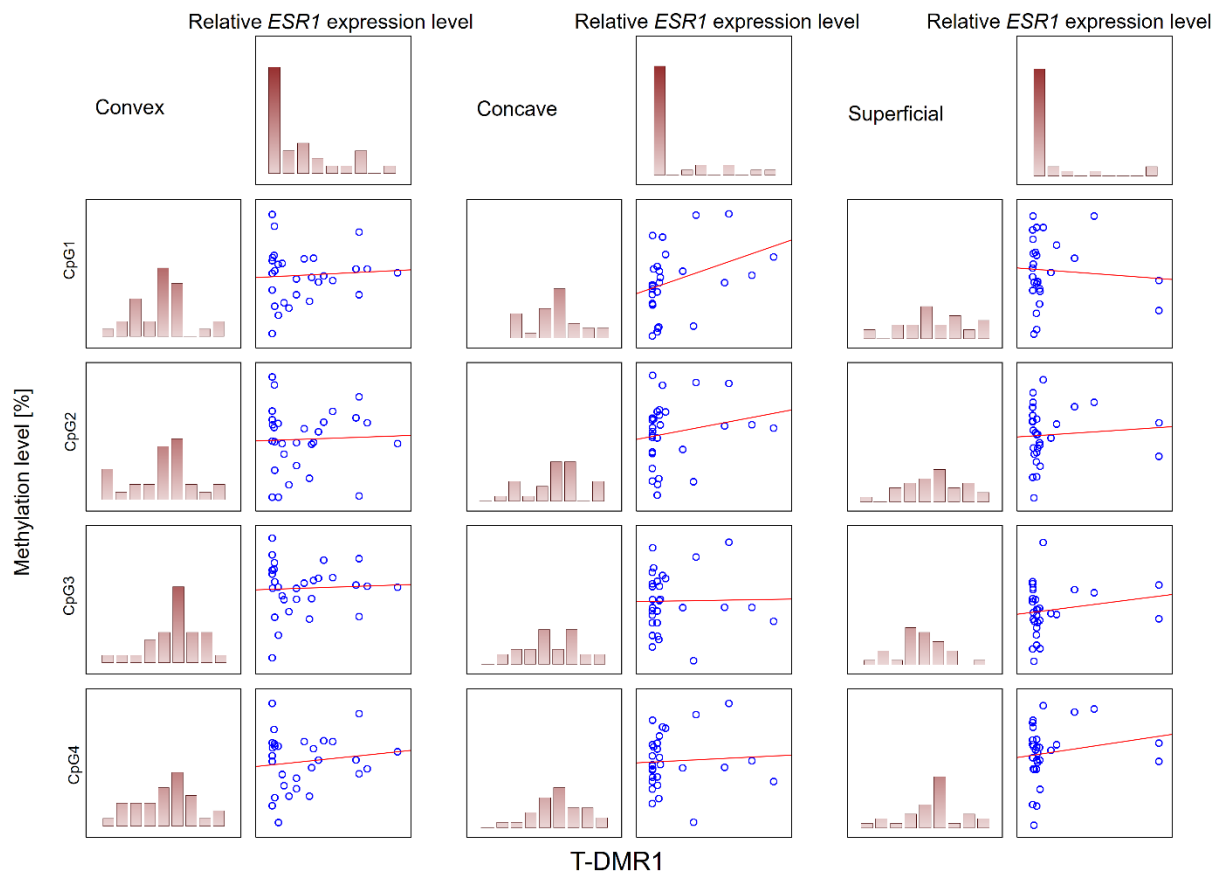

Supplementary Figure S2. Scatter plots showing correlations between *ESR1* expression and methylation level within T-DMR1 region in deep paravertebral muscles and superficial muscles.

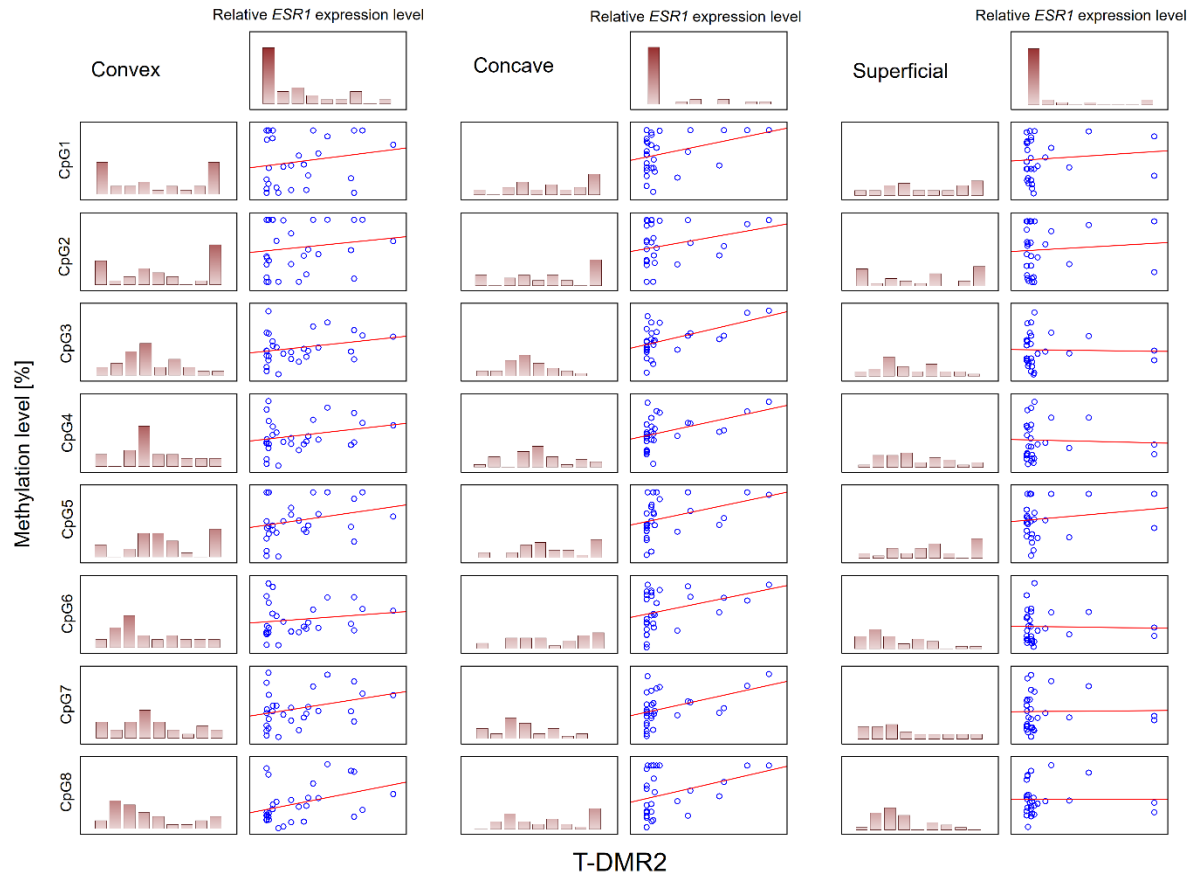

Supplementary Figure S3. Scatter plots showing correlations between *ESR1* expression and methylation level within T-DMR2 region in deep paravertebral muscles and superficial muscles.

Supplementary Table S1. DNA methylation level [%] within *ESR1* T-DMR1 and T-DMR2 regions in deep paravertebral muscles and superficial muscles (N=29).

|                            | CpG no. | M     | Me    | Q1    | Q3     | SD    | p-value              |
|----------------------------|---------|-------|-------|-------|--------|-------|----------------------|
| T-DMR1                     |         |       |       |       |        |       |                      |
| deep muscle - convex side  | CpG1    | 50.57 | 51.15 | 45.13 | 54.81  | 7.44  | 0.0001 <sup>a</sup>  |
| deep muscle - concave side |         | 49.75 | 49.10 | 46.90 | 52.57  | 7.06  |                      |
| superficial muscle         |         | 55.75 | 55.34 | 51.78 | 59.64  | 6.81  |                      |
| deep muscle - convex side  | CpG2    | 72.38 | 71.95 | 68.58 | 76.81  | 8.07  | <0.0001 <sup>a</sup> |
| deep muscle - concave side |         | 71.26 | 72.85 | 65.60 | 76.54  | 9.50  |                      |
| superficial muscle         |         | 78.73 | 78.95 | 72.59 | 84.26  | 9.51  |                      |
| deep muscle - convex side  | CpG3    | 66.84 | 67.62 | 62.78 | 72.16  | 9.33  | 0.11 <sup>a</sup>    |
| deep muscle - concave side |         | 67.68 | 65.66 | 61.12 | 74.03  | 9.45  |                      |
| superficial muscle         |         | 70.78 | 69.95 | 66.38 | 77.99  | 9.97  |                      |
| deep muscle - convex side  | CpG4    | 46.36 | 46.81 | 42.36 | 50.73  | 6.62  | 0.06 <sup>a</sup>    |
| deep muscle - concave side |         | 47.51 | 46.65 | 43.62 | 51.48  | 6.62  |                      |
| superficial muscle         |         | 49.33 | 50.04 | 47.23 | 52.29  | 6.46  |                      |
| T-DMR2                     |         |       |       |       |        |       |                      |
| deep muscle - convex side  | CpG1    | 36.86 | 36.48 | 34.27 | 39.41  | 2.48  | 0.0003 <sup>b</sup>  |
| deep muscle - concave side |         | 36.37 | 36.57 | 33.92 | 39.46  | 3.12  |                      |
| superficial muscle         |         | 39.58 | 38.94 | 35.29 | 44.17  | 5.05  |                      |
| deep muscle - convex side  | CpG2    | 23.32 | 23.06 | 21.45 | 26.43  | 2.69  | 0.0001 <sup>b</sup>  |
| deep muscle - concave side |         | 23.58 | 23.83 | 21.81 | 25.97  | 2.40  |                      |
| superficial muscle         |         | 25.63 | 26.28 | 21.73 | 29.88  | 3.96  |                      |
| deep muscle - convex side  | CpG3    | 40.73 | 39.18 | 36.33 | 46.40  | 7.36  | 0.001 <sup>b</sup>   |
| deep muscle - concave side |         | 40.38 | 39.98 | 37.07 | 42.95  | 5.47  |                      |
| superficial muscle         |         | 45.31 | 43.63 | 39.91 | 50.13  | 7.81  |                      |
| deep muscle - convex side  | CpG4    | 33.88 | 32.22 | 30.38 | 38.42  | 6.92  | 0.002 <sup>b</sup>   |
| deep muscle - concave side |         | 33.11 | 32.84 | 30.29 | 35.90  | 5.19  |                      |
| superficial muscle         |         | 37.14 | 35.42 | 31.28 | 43.04  | 7.38  |                      |
| deep muscle - convex side  | CpG5    | 79.92 | 76.63 | 71.90 | 89.14  | 13.71 | 0.03 <sup>b</sup>    |
| deep muscle - concave side |         | 82.06 | 79.73 | 74.94 | 91.28  | 12.63 |                      |
| superficial muscle         |         | 85.61 | 84.90 | 76.66 | 100.00 | 10.85 |                      |
| deep muscle - convex side  | CpG6    | 22.00 | 20.15 | 18.58 | 25.01  | 4.82  | 0.0004 <sup>b</sup>  |
| deep muscle - concave side |         | 21.72 | 21.41 | 19.52 | 24.30  | 3.13  |                      |
| superficial muscle         |         | 24.74 | 23.21 | 19.65 | 28.72  | 6.16  |                      |
| deep muscle - convex side  | CpG7    | 44.49 | 43.19 | 38.06 | 52.15  | 9.75  | 0.0007 <sup>b</sup>  |
| deep muscle - concave side |         | 44.13 | 42.81 | 40.32 | 47.41  | 7.79  |                      |
| superficial muscle         |         | 48.36 | 45.13 | 40.01 | 55.22  | 10.02 |                      |
| deep muscle - convex side  | CpG8    | 15.37 | 13.85 | 11.88 | 17.00  | 5.04  | 0.002 <sup>b</sup>   |
| deep muscle - concave side |         | 15.04 | 14.68 | 11.59 | 19.74  | 4.00  |                      |
| superficial muscle         |         | 17.82 | 16.73 | 14.41 | 19.17  | 5.16  |                      |

<sup>a</sup>– ANOVA, <sup>b</sup> – Friedman test, M – Mean, Me – Median, Q1, Q3 – Lower and Upper Quartile, SD – Standard deviation

Supplementary Table S2. DNA methylation level [%] within *ESR1* T-DMR1 and T-DMR2 regions in deep paravertebral muscles and superficial muscles in the groups of patients with Cobb angle  $\leq 70^\circ$  (N=10) and  $>70^\circ$  (N=19).

|                            | CpG no. | M                    | Me    | Q1    | Q3    | SD    | M                    | Me    | Q1    | Q3     | SD    | p-value                  |
|----------------------------|---------|----------------------|-------|-------|-------|-------|----------------------|-------|-------|--------|-------|--------------------------|
|                            |         | Cobb angle ≤70, N=10 |       |       |       |       | Cobb angle >70, N=19 |       |       |        |       |                          |
|                            |         | T-DMR1               |       |       |       |       |                      |       |       |        |       |                          |
| deep muscle - convex side  | CpG1    | 50.82                | 51.15 | 48.65 | 53.70 | 4.06  | 50.44                | 51.15 | 42.85 | 55.30  | 8.83  | 0.89 <sup>c</sup>        |
| deep muscle - concave side |         | 49.19                | 49.09 | 47.47 | 51.18 | 5.17  | 50.05                | 49.57 | 44.59 | 55.28  | 7.99  | 0.76 <sup>c</sup>        |
| superficial muscle         |         | 53.50                | 52.54 | 47.10 | 59.64 | 7.97  | 56.93                | 56.27 | 53.16 | 61.22  | 6.01  | 0.20 <sup>c</sup>        |
| deep muscle - convex side  | CpG2    | 73.48                | 74.87 | 71.82 | 76.46 | 4.49  | 71.80                | 71.36 | 64.53 | 79.54  | 9.50  | 0.51 <sup>d</sup>        |
| deep muscle - concave side |         | 72.95                | 74.35 | 69.69 | 76.54 | 8.16  | 70.37                | 72.68 | 60.72 | 77.39  | 10.23 | 0.50 <sup>c</sup>        |
| superficial muscle         |         | 77.37                | 77.46 | 71.24 | 83.24 | 10.57 | 79.45                | 80.40 | 72.59 | 85.54  | 9.13  | 0.58 <sup>c</sup>        |
| deep muscle - convex side  | CpG3    | 68.76                | 68.64 | 66.88 | 72.16 | 5.77  | 65.82                | 67.28 | 58.18 | 73.62  | 10.75 | 0.43 <sup>c</sup>        |
| deep muscle - concave side |         | 68.62                | 66.75 | 64.50 | 73.27 | 8.54  | 67.18                | 65.61 | 60.63 | 74.97  | 10.08 | 0.70 <sup>c</sup>        |
| superficial muscle         |         | 70.51                | 71.40 | 66.78 | 79.17 | 9.77  | 70.93                | 69.59 | 65.93 | 77.99  | 10.34 | 0.92 <sup>c</sup>        |
| deep muscle - convex side  | CpG4    | 47.61                | 48.28 | 46.41 | 50.19 | 4.69  | 45.71                | 44.93 | 39.86 | 50.95  | 7.48  | 0.47 <sup>c</sup>        |
| deep muscle - concave side |         | 48.93                | 48.62 | 46.65 | 51.48 | 5.01  | 46.76                | 45.60 | 42.52 | 51.85  | 7.35  | 0.41 <sup>c</sup>        |
| superficial muscle         |         | 48.80                | 49.70 | 47.68 | 51.57 | 6.56  | 49.62                | 50.64 | 45.70 | 52.41  | 6.57  | 0.75 <sup>c</sup>        |
|                            |         | T-DMR2               |       |       |       |       |                      |       |       |        |       |                          |
| deep muscle - convex side  | CpG1    | 36.89                | 36.54 | 35.22 | 39.06 | 2.08  | 36.85                | 36.36 | 34.03 | 39.99  | 2.72  | 0.95 <sup>d</sup>        |
| deep muscle - concave side |         | 35.06                | 35.00 | 33.48 | 36.71 | 2.87  | 37.06                | 38.10 | 33.97 | 40.13  | 3.09  | 0.11 <sup>d</sup>        |
| superficial muscle         |         | 38.09                | 38.00 | 34.64 | 41.92 | 5.11  | 40.37                | 40.02 | 37.08 | 45.24  | 4.97  | 0.25 <sup>d</sup>        |
| deep muscle - convex side  | CpG2    | 22.94                | 22.51 | 21.87 | 24.93 | 2.38  | 23.51                | 24.04 | 20.37 | 26.43  | 2.88  | 0.67 <sup>d</sup>        |
| deep muscle - concave side |         | 22.16                | 22.13 | 19.50 | 23.91 | 2.25  | 24.32                | 24.13 | 22.45 | 26.40  | 2.17  | <b>0.02<sup>d</sup></b>  |
| superficial muscle         |         | 24.55                | 25.59 | 20.87 | 26.85 | 3.53  | 26.20                | 26.61 | 22.83 | 30.57  | 4.15  | 0.33 <sup>d</sup>        |
| deep muscle - convex side  | CpG3    | 39.60                | 39.04 | 36.67 | 40.95 | 5.47  | 41.33                | 39.37 | 35.19 | 47.94  | 8.25  | 0.56 <sup>c</sup>        |
| deep muscle - concave side |         | 37.98                | 38.15 | 36.05 | 39.89 | 5.90  | 41.65                | 42.03 | 37.95 | 44.59  | 4.93  | <b>0.04<sup>d</sup></b>  |
| superficial muscle         |         | 42.64                | 40.30 | 37.65 | 49.45 | 7.11  | 46.72                | 44.50 | 41.04 | 52.30  | 7.97  | 0.19 <sup>c</sup>        |
| deep muscle - convex side  | CpG4    | 31.14                | 30.39 | 30.05 | 32.43 | 4.76  | 35.32                | 33.77 | 31.12 | 40.27  | 7.53  | 0.12 <sup>c</sup>        |
| deep muscle - concave side |         | 30.37                | 30.82 | 26.72 | 32.84 | 4.97  | 34.55                | 34.09 | 31.59 | 37.78  | 4.81  | <b>0.04<sup>c</sup></b>  |
| superficial muscle         |         | 33.86                | 31.41 | 29.67 | 39.17 | 5.79  | 38.87                | 35.57 | 31.92 | 46.40  | 7.66  | 0.08 <sup>c</sup>        |
| deep muscle - convex side  | CpG5    | 77.98                | 75.91 | 73.64 | 84.70 | 11.17 | 80.94                | 79.73 | 71.55 | 100.00 | 15.06 | 0.60 <sup>c</sup>        |
| deep muscle - concave side |         | 82.03                | 78.49 | 76.34 | 85.77 | 10.96 | 82.07                | 81.85 | 72.79 | 95.32  | 13.72 | 0.99 <sup>c</sup>        |
| superficial muscle         |         | 83.49                | 83.48 | 75.59 | 87.26 | 10.69 | 86.73                | 85.74 | 76.66 | 100.00 | 11.06 | 0.46 <sup>c</sup>        |
| deep muscle - convex side  | CpG6    | 20.05                | 19.83 | 18.58 | 20.84 | 2.89  | 23.03                | 21.45 | 18.47 | 28.64  | 5.35  | 0.11 <sup>c</sup>        |
| deep muscle - concave side |         | 19.57                | 19.65 | 18.57 | 20.90 | 2.11  | 22.86                | 23.99 | 21.01 | 25.03  | 3.00  | <b>0.005<sup>d</sup></b> |
| superficial muscle         |         | 21.79                | 20.40 | 18.78 | 24.79 | 4.04  | 26.29                | 24.42 | 20.98 | 30.75  | 6.60  | 0.06 <sup>c</sup>        |
| deep muscle - convex side  | CpG7    | 41.12                | 41.47 | 38.06 | 43.32 | 7.24  | 46.26                | 45.52 | 37.55 | 52.94  | 10.58 | 0.18 <sup>c</sup>        |
| deep muscle - concave side |         | 40.58                | 40.87 | 36.00 | 42.45 | 6.61  | 45.99                | 45.76 | 40.70 | 52.38  | 7.87  | 0.07 <sup>c</sup>        |
| superficial muscle         |         | 44.44                | 41.79 | 38.19 | 49.79 | 7.26  | 50.42                | 46.04 | 41.18 | 60.70  | 10.80 | 0.13 <sup>c</sup>        |
| deep muscle - convex side  | CpG8    | 14.45                | 12.34 | 11.04 | 16.90 | 4.75  | 15.86                | 14.81 | 11.88 | 17.99  | 5.24  | 0.37 <sup>d</sup>        |
| deep muscle - concave side |         | 13.94                | 11.83 | 11.00 | 17.97 | 4.02  | 15.62                | 15.71 | 11.59 | 20.40  | 3.97  | 0.35 <sup>d</sup>        |
| superficial muscle         |         | 16.10                | 16.71 | 12.78 | 17.93 | 4.60  | 18.73                | 17.24 | 15.09 | 24.41  | 5.32  | 0.29 <sup>d</sup>        |

<sup>c</sup> – t-test, <sup>d</sup> – U-Mann-Whitney test, M – Mean, Me – Median, Q1, Q3 – Lower and Upper Quartile, SD – Standard deviation
